# Supplementary material for: Pore-forming Esx proteins mediate toxin secretion by Mycobacterium tuberculosis
Source: PubMed Central journal article supplement (PMC7810871; doi:10.1038/s41467-020-20533-1), 2021-01-15
Supplement: 41467_2020_20533_MOESM1_ESM.pdf [file 41467_2020_20533_MOESM1_ESM.pdf]

## SUPPLEMENTARY INFORMATION

### Pore-forming Esx proteins mediate toxin secretion

#### by *Mycobacterium tuberculosis*

Uday Tak, Terje Dokland, and Michael Niederweis

Department of Microbiology, University of Alabama at Birmingham, 845 19th Street South,  
Birmingham, AL 35294, USA

**Running title:** Toxin secretion by *Mycobacterium tuberculosis*

\*Address correspondence to: Michael Niederweis, [mnieder@uab.edu](mailto:mnieder@uab.edu)

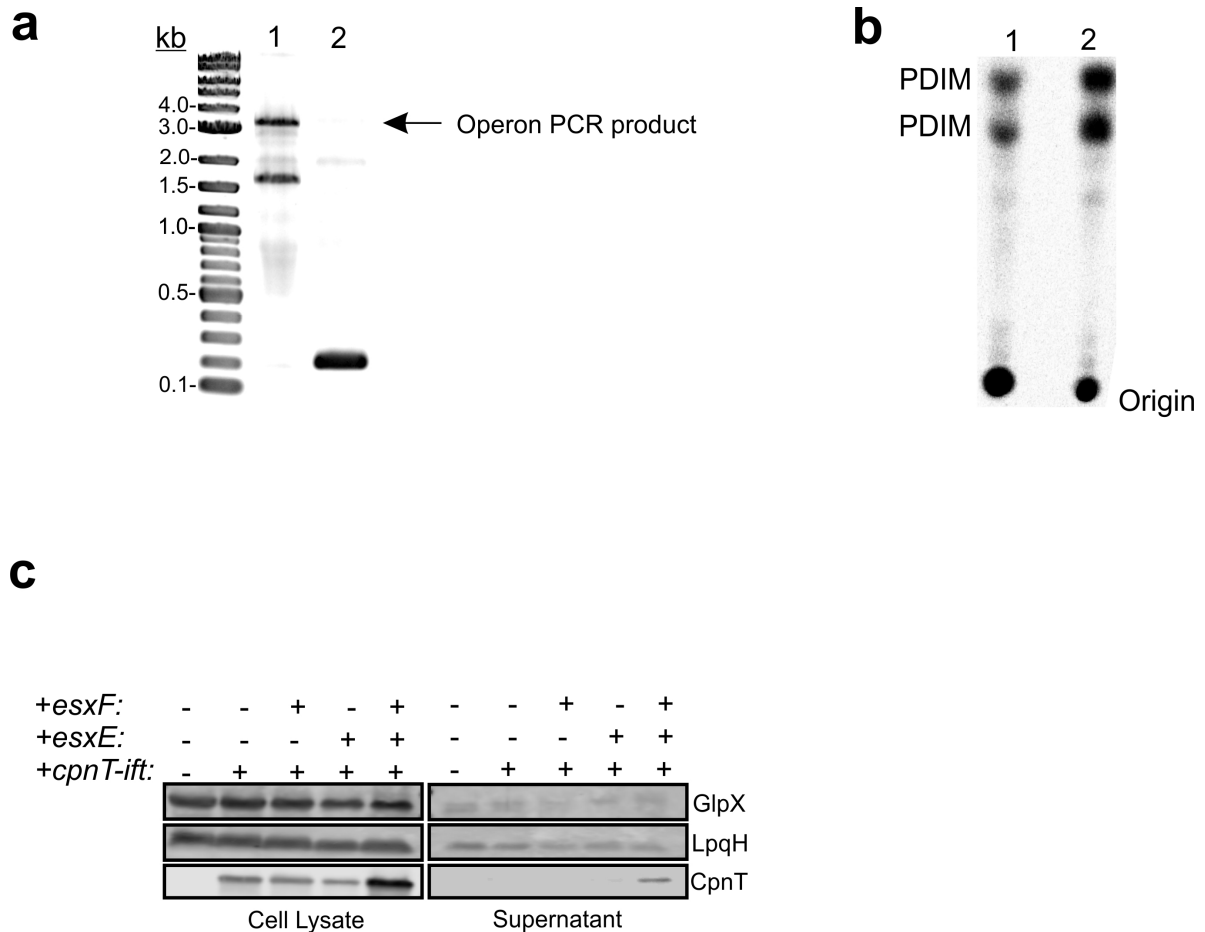

**Figure S1. Characterization of the *cpnT* operon mutant of *M. tuberculosis*.**

- Analysis of the *cpnT* operon deletion of Mtb.** PCR analysis of the Mtb mc<sup>2</sup>6206  $\Delta$ *esxFE-cpnT-ift* (ML2016) and of the parent strain Mtb mc<sup>2</sup>6206 used in this study (Table S2). Genomic DNA was amplified with *EsxF*-FWD-NdeI (forward primer) and IFT-REV-HindIII (reverse primer) for an expected product size of 3.6 kb (Table S4) Lane 1 indicates PCR amplification of wild type strain, and lane 2 indicates the  $\Delta$ *esxFE-cpnT-ift* strain. Experiment was performed once.
- Analysis of pthiocerol dimycocerosates (PDIM) in the *cpnT* operon mutant of Mtb.** Thin layer chromatography of lipid fraction from the indicated strains labelled with <sup>14</sup>C-propionate confirming the presence of the outer membrane lipid pthiocerol dimycocerosates (PDIM). Lane 1 indicates the wild type strain and lane 2 indicates the  $\Delta$ *esxFE-cpnT-ift* strain. Experiment was performed once.
- Secretion of CpnT *in vitro*.** The indicated Mtb strains were grown in AMTB medium without tyloxapol. The supernatant was filtered and concentrated. secretion assay for detection of CpnT in the culture supernatant using the indicated strains. Representative of at least 3 experiments.

a

## CFP-10 paralog

WxG

```

EsxF 1 MGADDTLRVEPAVMQG--FAASLDGAAEHLAVQLAELDA-QVGQM-LGCWRGASGSAYGS
EsxB 1 MAE---MKTDAATLAQ--EAGNFERISGDLKTQIDQVESTA-GSL-QGQWRGAAGTAAQA
EsxD 1 VAD--TIQVTPQMLRS--TANDIQANMEQAMGIKGYLANQENVMNPATWSGTGVVASHM
EsxG 1 MSLLLDA--HIPQLVASQSAFAAKAGLMRHTI-GQAEQAA-MSAQ---AFHQCESSAAFQA
EsxU 1 VSTPNTLNADFDLMRS--VAGITDARNEEIRAMLQAFIGRMSGVP-PSVWGGGLAAARFQD
EsxM 1 MAS--RFMTDPHAMRD--MAGRFEVHAQTVEDARRMWAASAQNIS-GAGWSGMAEATSLD

```

YxxxD/E

```

EsxF 57 AWELWHRGAGEVQLGLSMLAAAIHAGAAYQHNETASAOVIREVGG----G
EsxB 54 AVVRFQEAANKQKQELDEISTNIRQAGVQYSRADEEQQALSSQMG----F
EsxD 57 TATEITNELNKVLTGGTRIAEGLVQAAALMEGHEADSQTAFQALFGASHGS
EsxG 54 AHARFVAAAANKVNTLLDVAQANLGEAAGTYVAADAAAASTYTG-----F
EsxU 58 VVDRWNAESTRLYHVLHATADTIRHNEAALREAGQIHARHIAAAGGD---L
EsxM 56 TMT-MNQAFRNIVNMLHGVRDGLVRDANNYEQQEQASQQLS-----S

```

b

## Esat-6 paralog

WxG

```

EsxE 1 VDP--T-----VLADA-VARMAEFGRHVEELVAEIESLVTRLHVTVWIGEGAAAHAEQR
EsxA 1 MTE---QQWNEAGIEAA-ASATQGNVTSIHSLLDEGKQSLTKLAAAWGGSGSEAYQGVQQ
EsxC 1 MSD--QITYNPGAVSDF-ASDVGSRAGQLHMIYEDTASKTNALQEFFAGHGAQGFQDAQA
EsxH 1 MSQ---IMYNYPAMLGH-AGDMAGYAGTLQSLGAEIAVEQAALQSAWQGDGTGITYQAWQA
EsxT 1 MNADPVLSYNFDAIEYSVRQEIHTTAARFNAALQELRSQIAPLQQIWTREAAAAYHAEQL
EsxN 1 MTI---NYQFGDVEDAH-GAMIRAQAASLEAEHQATVIRDVLAAGDFWGGAGSVACQEFIT

```

GxW

```

EsxE 52 HWAAGEAMMRQALAQLTAAQSAHAN--YTGAMATNIGMWS-
EsxA 57 KWDATATELNNALQNLARTISEAGQA--MASTEGNVTGMFA-
EsxC 58 QMLSGLQGLIETVGOHGTGTTGHVLDN--AIGTDQALAGL-F-
EsxH 57 QWNQAMEDLVRAYHAMSST--HEANTMAMMARDTAEAAKWWG
EsxT 61 KWHQAASALNETLIDLGNAVRHGADD--VAHADRRRAGAWAR
EsxN 56 QLGRNFQVIYEQANAHGQKVQAAGNN--MAQTDSAVGSSWA-

```

**Figure S2. Sequence alignment of ESAT-6 and CFP-10 paralogs**

Multiple sequence alignment of (A) CFP-10 family proteins (EsxF paralogs) and (B) ESAT-6 family proteins (EsxE paralogs). The locations of the WxG and the YXXXD/E motif is indicated in the dashed red boxes. Also indicated is a conserved reverse WxG (GxW) motif found on the c-terminus of ESAT-6 homologues. Sequences were obtained from Mycobrowser and aligned in T-Coffee Expresso. The alignment was visualized using the BoxShade server.

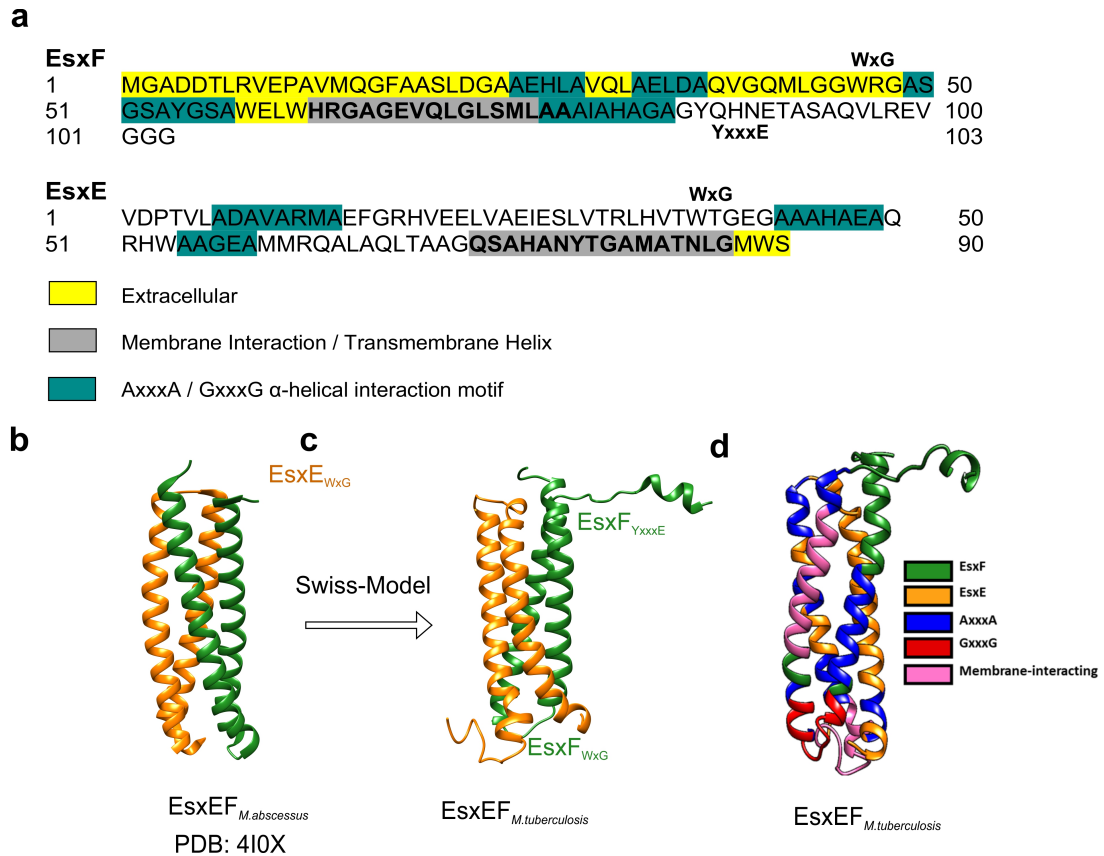

### Figure S3. *In-silico* analysis of the EsxE-EsxF heterodimer

- MemSAT analysis of predicted structural features in EsxF and EsxE. MemSAT was used to calculate predicted structural features with extracellular and membrane-interacting / transmembrane segments indicated. AXXXA and GXXXG motifs were also identified and indicated in teal colors.
- Structure of EsxE-EsxF homolog from *Mycobacterium abscessus* (PDB 410X), hereafter referred to as EsxE<sub>Mabs</sub>.
- Swiss model generated structure using EsxE<sub>Mabs</sub> and EsxAB as a homology template. Hereafter referred to as EsxE<sub>Mtb</sub>. The locations of the T7SS motifs are indicated: EsxF-WXG (W1), EsxE-WXG (W2), and EsxF-YXXXE.
- EsxE-EsxF model with the indicated features highlighted.



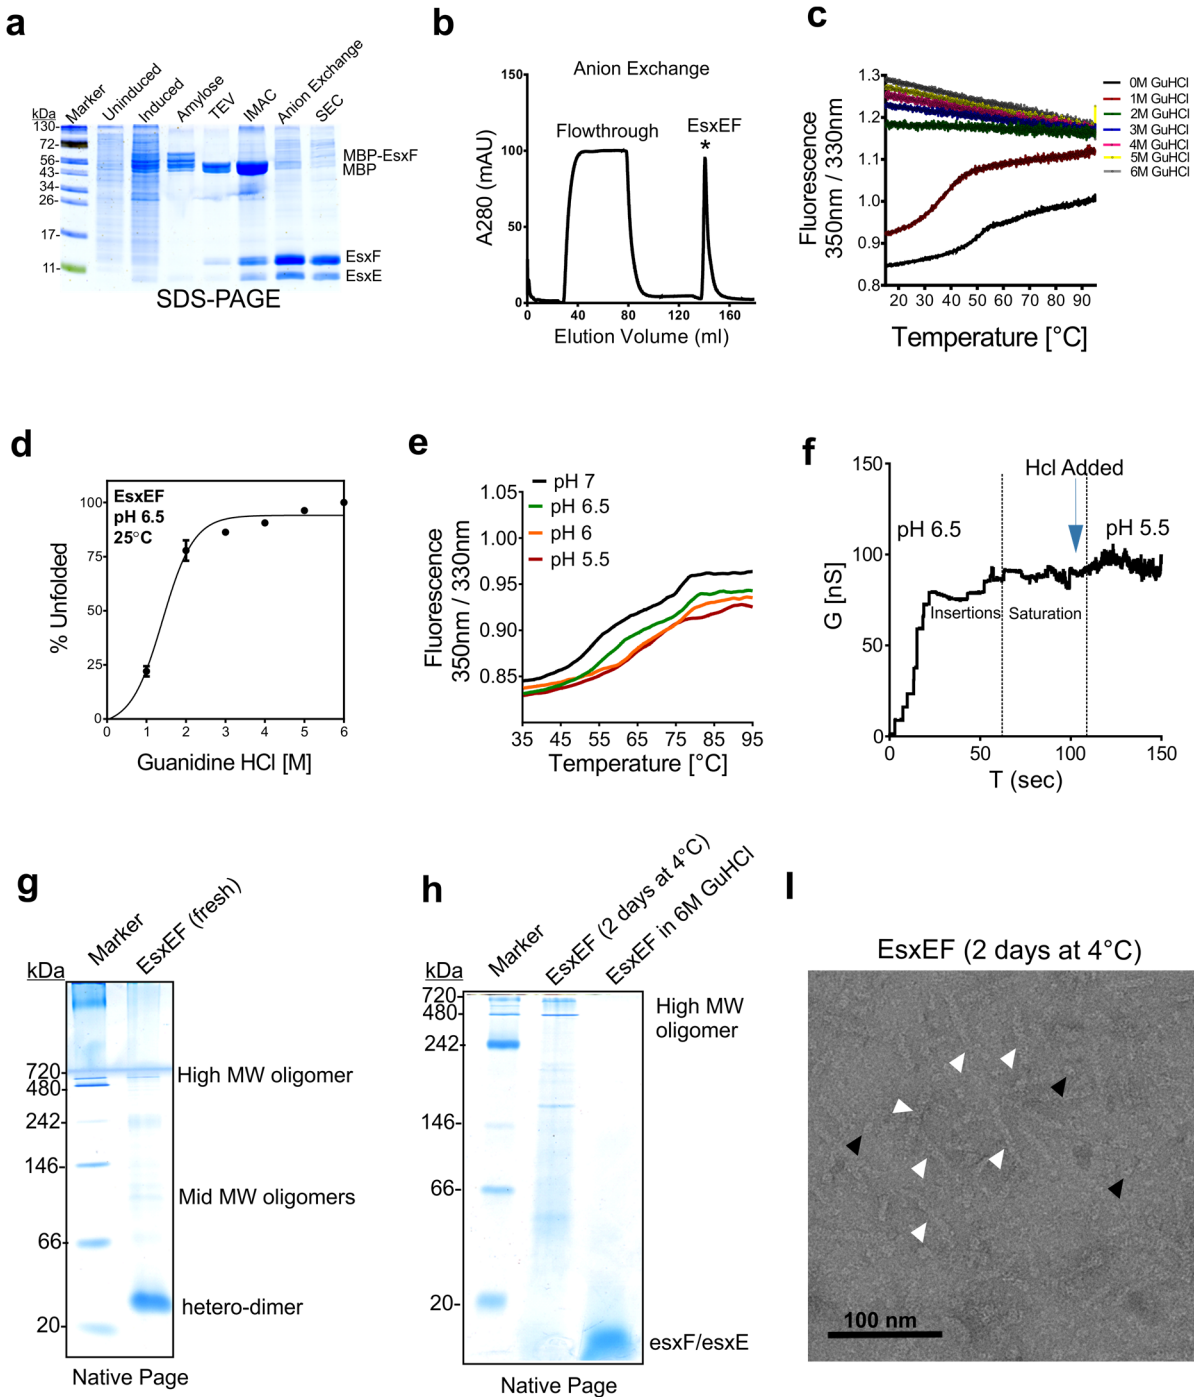

**Figure S4. Purification and biochemical analysis of the recombinant EsxE-EsxF complex.**

- a. Colloidal Coomassie-stained SDS PAGE gel indicating the purification steps and subsequent purity of EsxEF produced from *E. coli*. Representative of at least 3 purifications.
- b. Anion exchange chromatogram of the “IMAC” fraction from panel A run on a HiTrap QFF anion-exchange column using a Bio-Rad Duoflow HPLC system. Flow-through indicates the residual MBP which elutes at 150 mM NaCl. The sharp peak indicated with an asterisk (\*) indicates pure EsxEF. Further purification details can be found in methods.

- c. Nano-differential scanning fluorometry of EsxEF in 0 – 6 M guanidine hydrochloride to determine global folding of the protein. Data represents tryptophan fluorescence at 350nm (exposed to solvent) vs 330nm (buried in protein) as a function of the temperature. Data was collected on a NanoTemper Prometheus at the UAB structural biology core facility.
- d. Percent unfolding of EsxEF at 25°C for which all experiments were conducted derived from panel C data. The values for 6 M Guanidine hydrochloride were set to 100% and the values for 0 M were set to 0%. A sigmoidal fit was performed using Graphpad.
- e. EsxEF tryptophan fluorescence measurements performed on a NanoTemper Tycho in 25 mM sodium phosphate 150 mM NaCl at the indicated pH.
- f. Test of EsxEF channel gating by pH. Representative current trace indicating EsxEF insertions in DphpC membranes at pH 6.5 (labelled “Insertions”) which were then allowed to continue until saturation (labelled “saturation”). HCl was then added to the bilayer cuvette until the pH dropped to 5.5 (blue arrow “HCl added”) and data was recorded further. Representative of 5 membranes.
- g. Native polyacrylamide gel indicating freshly purified EsxEF. Indicated are the predicted heterodimer and oligomers of increasing sizes. Representative of at least 2 experiments.
- h. Native polyacrylamide gel of EsxEF left at 4°C for two days after purification and in 6 M guanidine hydrochloride (GuHCl). Representative of at least 2 experiments.
- i. Electron micrograph of EsxEF (2 days at 4°C) stained with 1% uranyl formate showing the conversion of EsxEF to filaments (white triangles). Black triangles indicate low molecular weight EsxEF pores. Data is from a single experiment on the sample which was left at 4°C for 2 days.

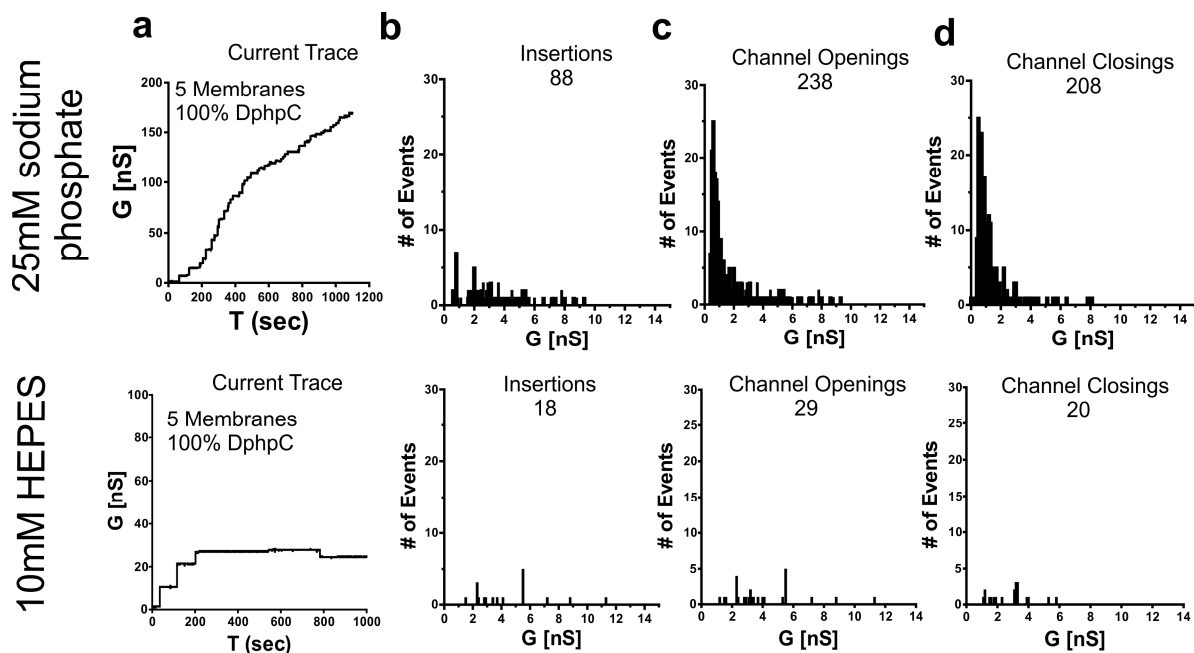

**Figure S5. Phosphate dependent pore-formation by EsxE-EsxF complex**

- Current Trace and total number of channel-insertion events in 25 mM sodium phosphate 1 M KCl pH 6.5 (Top) or 10 mM HEPES, 1M KCl pH 6.5 (bottom panel).
- Conductance values recorded for all insertion events in phosphate (top) or HEPES (bottom) buffer.
- Channel opening events in phosphate (top) or HEPES (bottom) buffer.
- Channel closing events in phosphate (top) or HEPES (bottom) buffer.

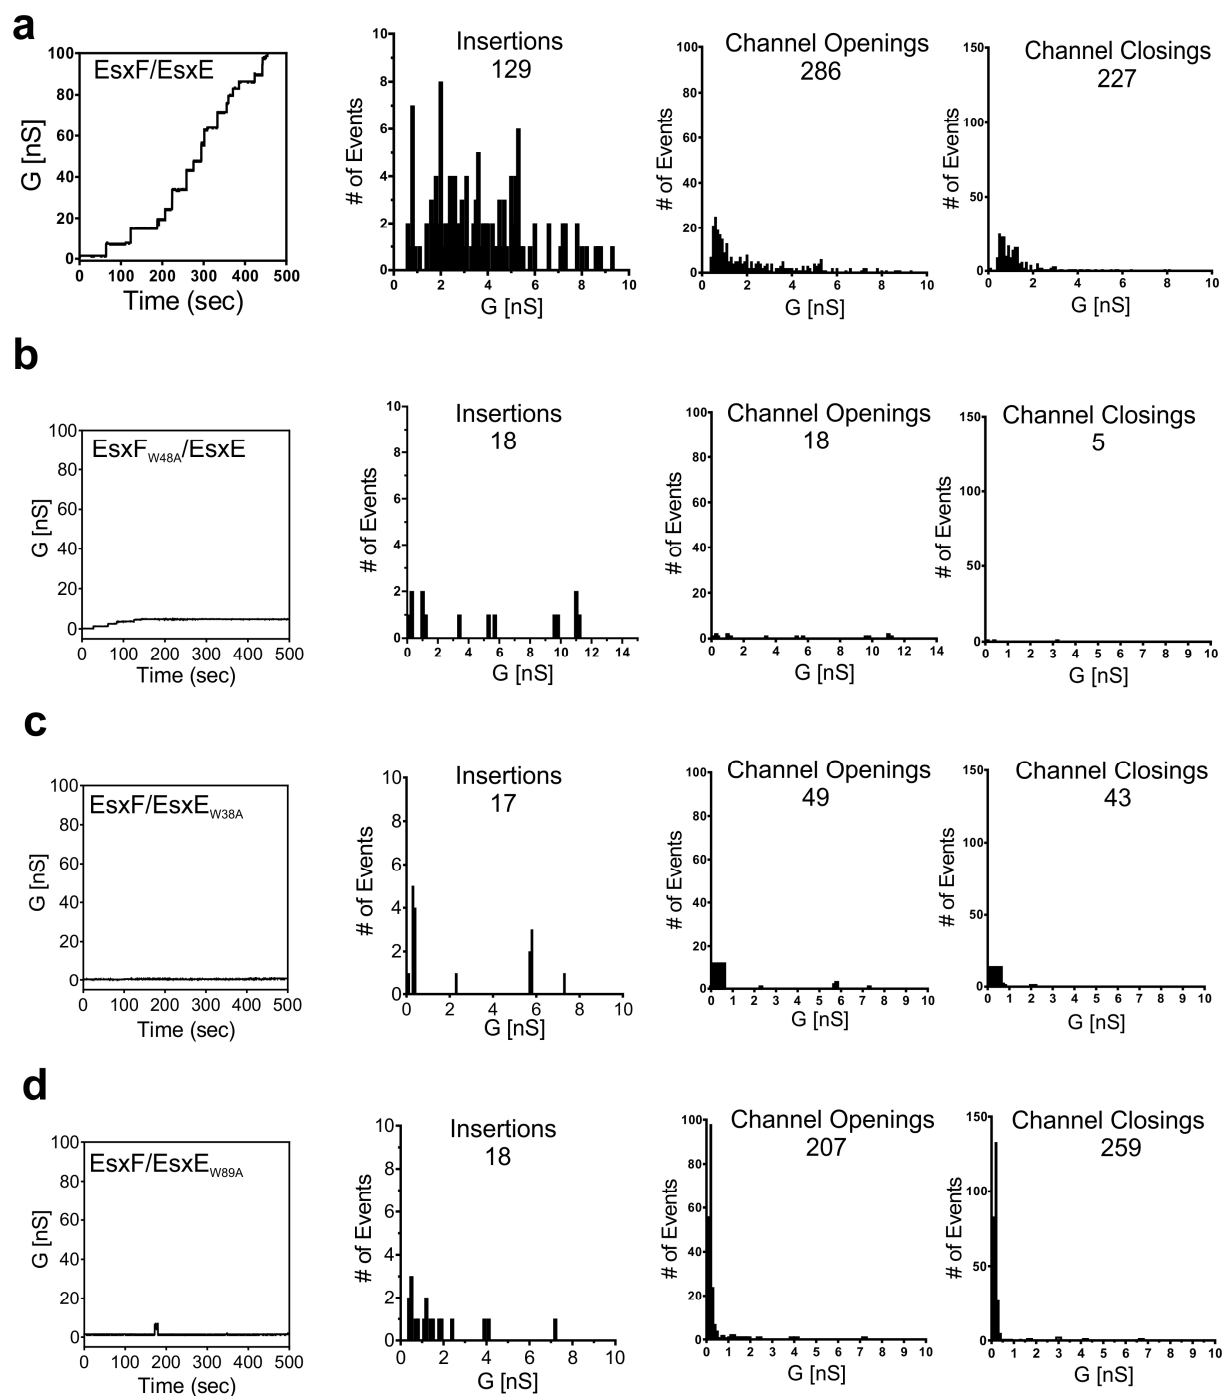

**Figure S6. Channel activity of the wt and mutated EsxE-EsxF complexes by lipid bilayer experiments.**

The planar lipid bilayer experiments were done in 25 mM sodium phosphate 1 M KCl, at -10 mV in diphytanoyl phosphatidylcholine (DPhPC) membranes for EsxEF (a) and the indicated WxG variants (b-d). From left to right per row: representative current trace, total channel insertion events, total channel opening events, and total channel closing events. A total of 10 membranes were performed using 1  $\mu$ g of protein added to the cis and trans side. This figure accompanies figures 4 and 5.

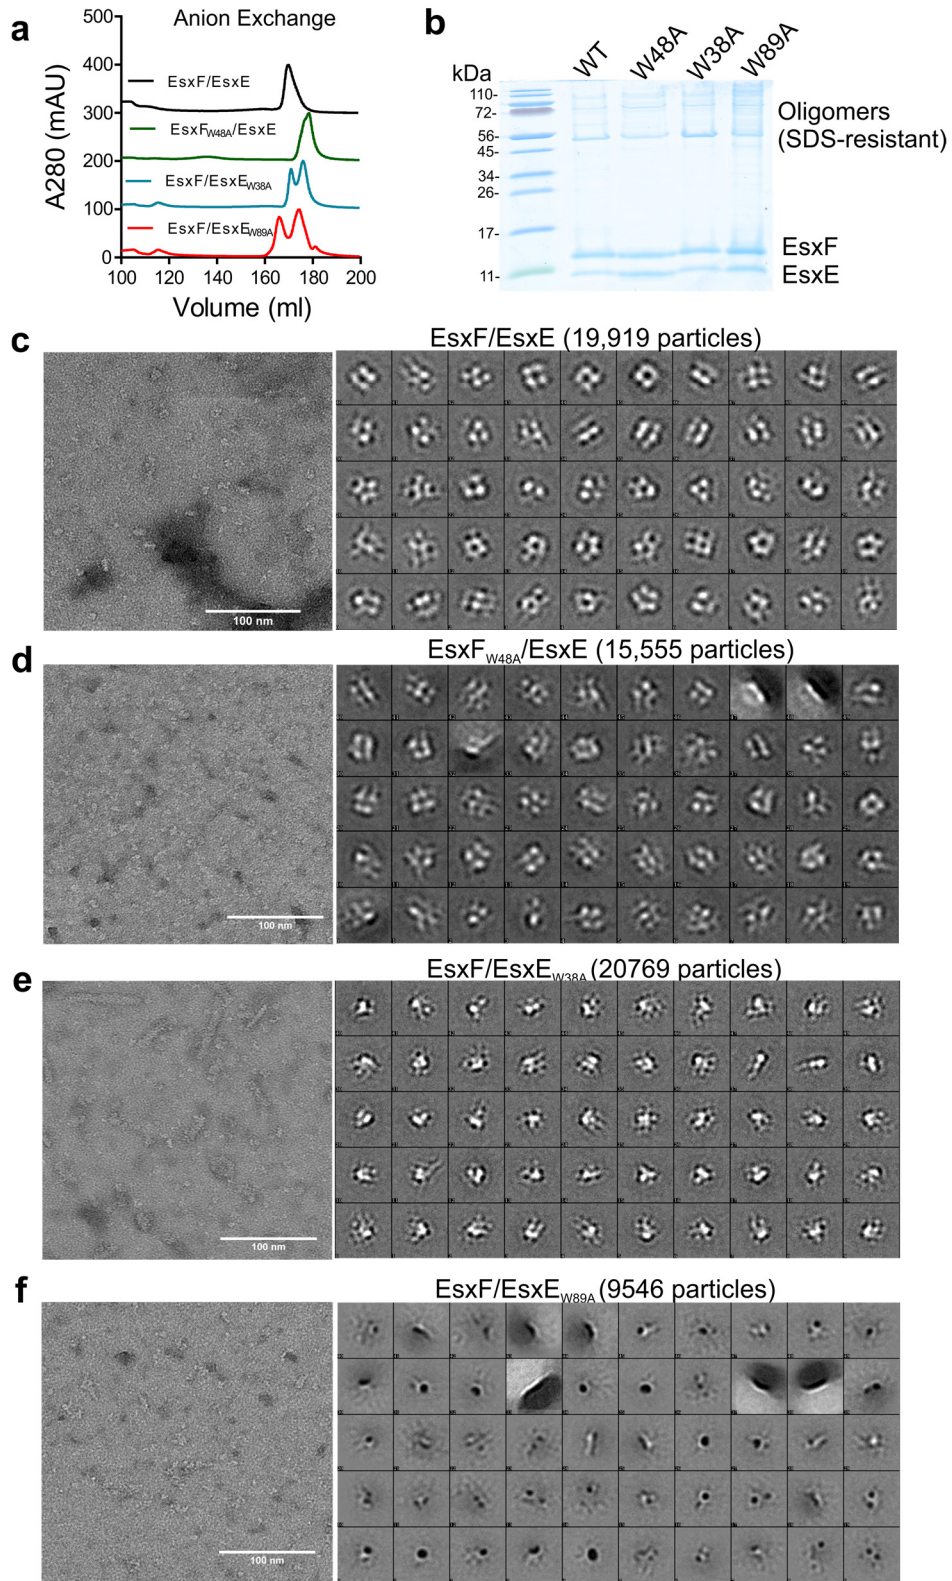

**Figure S7. Purification and electron microscopy of WXG mutants of the EsxE-EsxF complex.**

- a. Anion exchange chromatograms of the indicated EsxEF WxG variants compared to wild type.
- b. Coomassie-stained SDS-PAGE gel of the anion exchange fractions indicating the presence of EsxF and EsxE proteins and SDS-resistant oligomers. Representative of at least two purifications.
- c. Raw electron micrograph of 50 nM EsxEF (C) or the indicated WxG variant: EsxF<sub>W48A</sub>/EsxE (d), EsxF/EsxE<sub>W38A</sub> (e) or EsxF/EsxE<sub>W89A</sub> (f) stained with 1% uranyl formate. Shown are the full reference-free 2D-class averages for each protein calculated in EMAN2.2. 2D averages were collected from a single EM session. At least two separate protein preparations were screened by EM for WT, EsxF<sub>W48A</sub>/EsxE, EsxF/EsxE<sub>W38A</sub>, and one for EsxF/EsxE<sub>W89A</sub>.

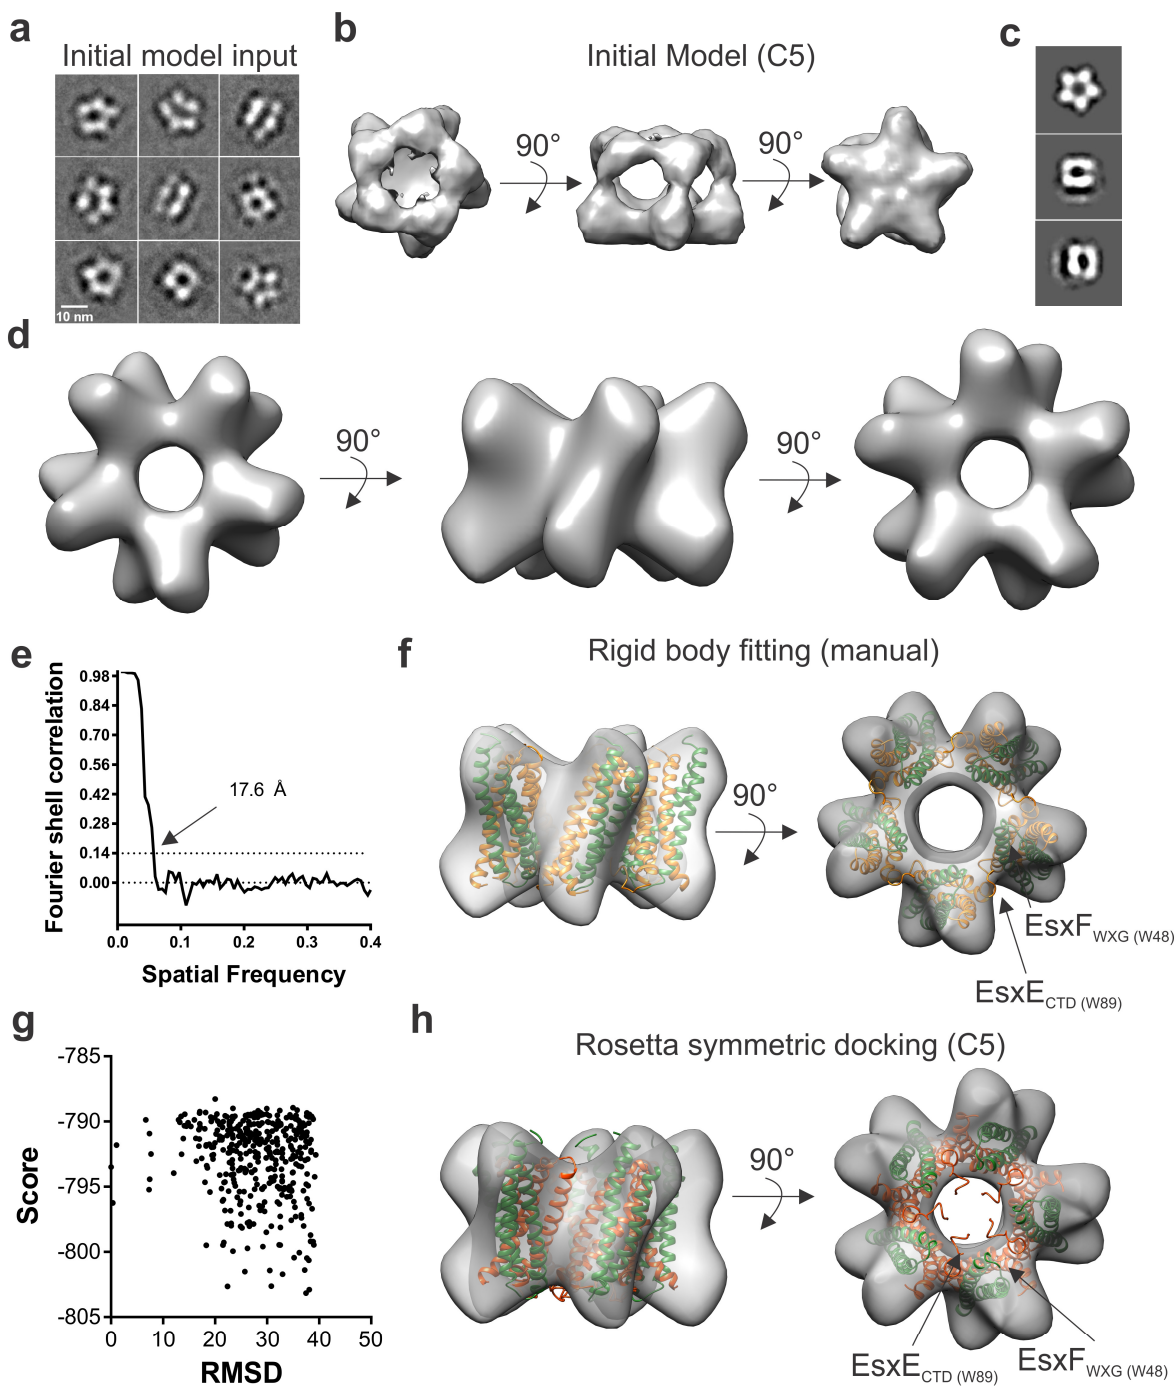

**Figure S8. Negative stain reconstruction of EsxEF.**

- Reference-free 2D class averages used for initial model generation. Data are from a single EM session.
- Initial model generated with C5 symmetry from input averages shown in A.
- Projection images from initial model shown in B. Data are from a single EM session.
- 3D refinement of initial model with C5 symmetry.

- e. Fourier shell correlation of the refined 3D density map shown in D.
- f. Rigid body fitting of five copies of the EsxF/EsxE homology model in chimera. The disordered CTD of EsxF was truncated for fitting. Indicated are the locations of the EsxF WXG motif and the EsxE CTD (GXW) motif.
- g. Score vs root mean squared deviation plot from 1000 structures generated by the Rosetta symmetric docking program using C5 symmetry and the EsxF/EsxE homology model as an input.
- h. Lowest free energy *de-novo* Rosetta structure of EsxF/EsxE fit as a rigid body into the negative stain density map using Chimera.



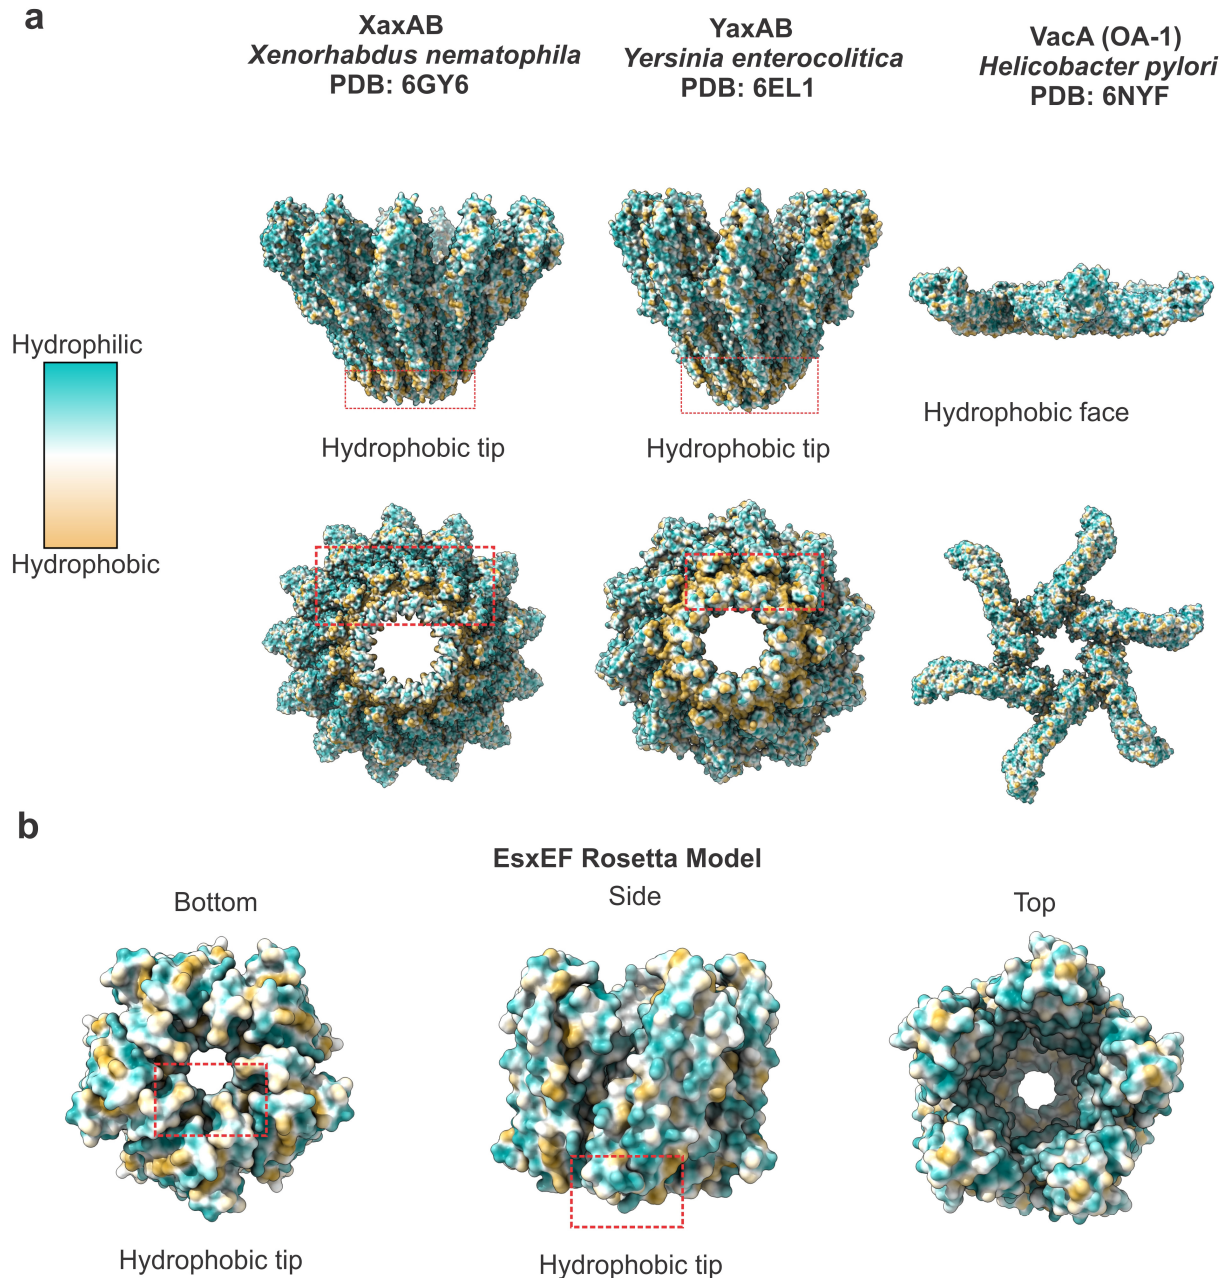

**Figure S9. Comparison of EsxEF model with pore-forming proteins.**

- a.** Surface structures of the indicated pore-forming toxins colored by hydrophobicity using ChimeraX. The side and bottom views are represented and the location of the hydrophobic tip and / or hydrophobic face of the oligomer is indicated by red dashed lines. PDB 6GYG (Schubert et al, *eLife* 2018), PDB 6EL1 (Brauning et al, *Nat. Communications* 2018), PDB 6NYF (Zhang et al, *PNAS* 2019).
- b.** EsxEF Rosetta model (described in Figure S8) represented by hydrophobicity. The location of a putative hydrophobic tip formed by tryptophan 89 of EsxE is indicated in red dashes. Bottom, side, and top assignments are hypothetical based on the model.

**Table S1. Plasmids used in this study**

| <b>Plasmid</b> | <b>Properties</b>                                                                                                                                                               | <b>Reference</b> |
|----------------|---------------------------------------------------------------------------------------------------------------------------------------------------------------------------------|------------------|
| pML3924        | <i>E. coli</i> expression vector: pBR322 origin, <i>bla</i> , <i>lacI<sup>q</sup></i> , P <sub>T7lac</sub> His6- <i>malE</i> -polyN-TEV- <i>esxF</i> - <i>esxE<sub>WT</sub></i> | This study       |
| pML3938        | mycobacterial expression vector: episomal, <i>hyg<sup>R</sup></i> , pAL5000: <i>psmyc-cpnT-ifT</i>                                                                              | This study       |
| pML3941        | mycobacterial expression vector: integrative, <i>kan<sup>R</sup></i> , attL5: <i>psmyc-esxF-esxE</i>                                                                            | This study       |
| pML3954        | mycobacterial expression vector: integrative, <i>kan<sup>R</sup></i> , attL5: <i>psmyc-esxF<sub>W48A</sub>-esxE</i>                                                             | This study       |
| pML3955        | mycobacterial expression vector: integrative, <i>kan<sup>R</sup></i> , attL5: <i>psmyc-esxF<sub>Y86A</sub>-esxE</i>                                                             | This study       |
| pML3956        | mycobacterial expression vector: integrative, <i>kan<sup>R</sup></i> , attL5: <i>psmyc-esxF</i>                                                                                 | This study       |
| pML3957        | mycobacterial expression vector: integrative, <i>kan<sup>R</sup></i> , attL5: <i>psmyc-esxE</i>                                                                                 | This study       |
| pML3958        | mycobacterial expression vector: integrative, <i>kan<sup>R</sup></i> , attL5: <i>psmyc-esxF-esxE<sub>W38A</sub></i>                                                             | This study       |
| pML3962        | <i>E. coli</i> expression vector vector: pBR322 origin, <i>bla</i> , <i>lacI<sup>q</sup></i> , P <sub>T7lac</sub> His6- <i>malE</i> -polyN-TEV- <i>esxF<sub>W48A</sub>-esxE</i> | This study       |
| pML3963        | <i>E. coli</i> expression vector vector: pBR322 origin, <i>bla</i> , <i>lacI<sup>q</sup></i> , P <sub>T7lac</sub> His6- <i>malE</i> -polyN-TEV- <i>esxF-esxE<sub>W38A</sub></i> | This study       |
| pML4512        | <i>E. coli</i> expression vector vector: pBR322 origin, <i>bla</i> , <i>lacI<sup>q</sup></i> , P <sub>T7lac</sub> His6- <i>malE</i> -polyN-TEV- <i>esxF-esxE<sub>W89A</sub></i> | This study       |
| pML4514        | mycobacterial expression vector: integrative, <i>kan<sup>R</sup></i> , attL5: <i>psmyc-esxF-esxE<sub>W89A</sub></i>                                                             | This study       |
| pML4515        | mycobacterial expression vector: integrative, <i>kan<sup>R</sup></i> , attL5: <i>psmyc-esxF-esxE<math>\Delta</math>AA87-90</i>                                                  | This study       |

**Table S2. Mycobacterial strains used in this study**

| Strain                                                                                                                                               | Source                                                | Reference / Identifier |
|------------------------------------------------------------------------------------------------------------------------------------------------------|-------------------------------------------------------|------------------------|
| <i>M. tuberculosis</i> mc <sup>2</sup> 6206 H37Rv derivative: $\Delta$ <i>leuCD</i> , $\Delta$ <i>panCD</i> . Auxotroph BSL-2 strain. Parent strain. | Dr. William R Jacobs Jr. (Albert Einstein University) | (Sampson et al., 2004) |
| <i>M. tuberculosis</i> mc <sup>2</sup> 6206 $\Delta$ <i>esxF-esxE-cpnT-ift</i>                                                                       | This study                                            | ML2016                 |
| ML2016 / pML3938                                                                                                                                     | This study                                            | ML2625                 |
| ML2016 <i>attL5</i> ::pML3941 / pML3938                                                                                                              | This study                                            | ML2635                 |
| ML2016 <i>attL5</i> ::pML3954 / pML3938                                                                                                              | This study                                            | ML2636                 |
| ML2016 <i>attL5</i> ::pML3955 / pML3938                                                                                                              | This study                                            | ML2637                 |
| ML2016 <i>attL5</i> ::pML3956 / pML3938                                                                                                              | This study                                            | ML2638                 |
| ML2016 <i>attL5</i> ::pML3957 / pML3938                                                                                                              | This study                                            | ML2639                 |
| ML2016 <i>attL5</i> ::pML3958 / pML3938                                                                                                              | This study                                            | ML2640                 |
| ML2016 <i>attL5</i> ::pML4514 / pML3938                                                                                                              | This study                                            | ML2684                 |
| ML2016 <i>attL5</i> ::pML4515 / pML3938                                                                                                              | This study                                            | ML2685                 |

**Table S3. Antibodies used in this study**

| Antibody                                              | Source             | Identifier                               |
|-------------------------------------------------------|--------------------|------------------------------------------|
| Rabbit polyclonal anti-TNT                            | Genscript          | (Danilchanka et al., 2014)               |
| Rabbit polyclonal anti-EsxF                           | Genscript          | This study.                              |
| Rabbit polyclonal anti-EsxE                           | Genscript          | This study.                              |
| Rabbit polyclonal anti-IFT                            | Genscript          | (Sun et al. 2015)                        |
| Rabbit polyclonal anti-GlpX                           | UAB Hybridoma core | (Speer et al., 2015)                     |
| Mouse monoclonal anti-LpqH                            | BEI Resources      | NR-13792                                 |
| Mouse monoclonal anti-RNA Polymerase $\beta$ Subunit  | Biolegend          | Cat # 663903                             |
| Mouse monoclonal anti-MctB                            | UAB Hybridoma core | (Mitra et al., 2017; Speer et al., 2015) |
| Donkey anti-rabbit IgG (H+L)-Alexafluor-594 secondary | Thermo Fisher      | Cat # A-21207                            |
| Goat anti-rabbit IgG-FITC secondary                   | Sigma Aldrich      | 12-507                                   |
| IRDye 680RD Donkey anti-rabbit IgG secondary          | LI-COR             | 926-68073                                |
| IRDye 800CW Goat anti-mouse IgG Secondary             | LI-COR             | 926-332210                               |

**Table S4. Oligonucleotides used in this study**

| <b>Oligonucleotide name</b>  | <b>Sequence</b>                                                 |
|------------------------------|-----------------------------------------------------------------|
| EsxF-NdeI-FWD                | AGCCATATGGGTGCCGACGACAGCT                                       |
| EsxE-HindIII-Rev             | GGCCGCAAGCTTTCACGACCACATACCCAAATT                               |
| EsxF-Pacl-FWD                | ATATTTAATTAACAGAAAGGAGGATTTCAACTATCATGGGTGCCGACGACA<br>CGC      |
| EsxF-W48A-FWD                | TGTTGGGCGGGGCCCGCGGGGCGTCGGGC                                   |
| EsxF-W48A-REV                | GCCCGACGCCCCGCGGGCCCCGCCCAACA                                   |
| EsxE-W38A-FWD                | CATGTGACGGCCACGGGGGAG                                           |
| EsxE-W38A-REV                | CTCCCCCGTGGCCGTCACATG                                           |
| EsxF-Y86A-FWD                | GCCGGTGCGGGTGCCCAACACAACGAGACC                                  |
| EsxF-Y86A-REV                | GGTCTCGTTGTGTTGGGCACCCGCACCGGC                                  |
| EsxE-87-90-Trunc-HindIII-REV | GCGGCCGAAGCTTTCACAAATTCGTGGCCA                                  |
| EsxE-W89A-REV                | AGTGCGGCCGAAGCTTTCACGAGGCCATACCCAAATTCGT                        |
| CpnT-pacl-FWD                | ATATTTAATTAACAGAAAGGAGGATTTCAACTATCATGGCGCCGTTGGCG<br>GTCGATCCC |
| IFT-hindIII-REV              | GCAAGCTTTAACCCCTTATAGTCCTTCCAAA                                 |
| EsxF-HindIII-REV             | ATATATAAGCTTTCAGCCACCGCCCACCTCACG                               |
| EsxE-Pacl-FWD                | ATATTTAATTAACAGAAAGGAGGATTTCAACTATCGTGGATCCGACCGTGT<br>TG       |

## Supplementary References

Bräuning B, Bertosin E, Praetorius F, Ihling C, Schatt A, Adler A, Richter K, Sinz A, Dietz H, Groll M. Structure and mechanism of the two-component  $\alpha$ -helical pore-forming toxin YaxAB. *Nat Commun*. 2018 May 4;9(1):1806.

Danilchanka, O., Sun, J., Pavlenok, M., Maueroeder, C., Speer, A., Siroy, A., Marrero, J., Trujillo, C., Mayhew, D.L., Doornbos, K.S., *et al.* (2014). An outer membrane channel protein of *Mycobacterium tuberculosis* with exotoxin activity. *Proc Natl Acad Sci U S A* 111, 6750-6755.

Mitra, A., Speer, A., Lin, K., Ehrt, S., and Niederweis, M. (2017). PPE Surface Proteins Are Required for Heme Utilization by *Mycobacterium tuberculosis*. *MBio* 8.

Sampson, S.L., Dascher, C.C., Sambandamurthy, V.K., Russell, R.G., Jacobs, W.R., Jr., Bloom, B.R., and Hondalus, M.K. (2004). Protection elicited by a double leucine and pantothenate auxotroph of *Mycobacterium tuberculosis* in guinea pigs. *Infect Immun* 72, 3031-3037.

Schubert E, Vetter IR, Prumbaum D, Penczek PA, Raunser S. Membrane insertion of  $\alpha$ -xenorhabdolysin in near-atomic detail. *Elife*. 2018 Jul 16;7:e38017.

Speer, A., Sun, J., Danilchanka, O., Meikle, V., Rowland, J.L., Walter, K., Buck, B.R., Pavlenok, M., Holscher, C., Ehrt, S., *et al.* (2015). Surface hydrolysis of sphingomyelin by the outer membrane protein Rv0888 supports replication of *Mycobacterium tuberculosis* in macrophages. *Mol Microbiol* 97, 881-897.

Sun J, Siroy A, Lokareddy RK, et al. The tuberculosis necrotizing toxin kills macrophages by hydrolyzing NAD. *Nat Struct Mol Biol*. 2015;22(9):672-678.

Zhang K, Zhang H, Li S, Pintilie GD, Mou TC, Gao Y, Zhang Q, van den Bedem H, Schmid MF, Au SWN, Chiu W. Cryo-EM structures of *Helicobacter pylori* vacuolating cytotoxin A oligomeric assemblies at near-atomic resolution. *Proc Natl Acad Sci U S A*. 2019 Apr 2;116(14):6800-6805.
