# Supplementary material for: Pore-forming Esx proteins mediate toxin secretion by Mycobacterium tuberculosis
Source: PubMed Central journal article supplement (PMC7810871; doi:10.1038/s41467-020-20533-1), 2021-01-15
Supplement: 41467_2020_20533_MOESM3_ESM.pdf [file 41467_2020_20533_MOESM3_ESM.pdf]

## **Description of Additional Supplementary Files**

File Name: Supplementary Data 1

Description: PDB files of all structural models
